# Supplementary material for: Optical microscopy reveals the dynamic nature of B. pseudomallei morphology during β-lactam antimicrobial susceptibility testing
Source: PubMed Central journal article supplement (PMC7364477; doi:10.1186/s12866-020-01865-w), 2020-07-16

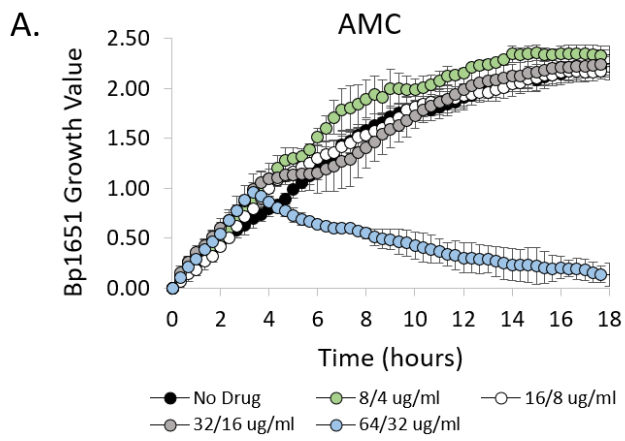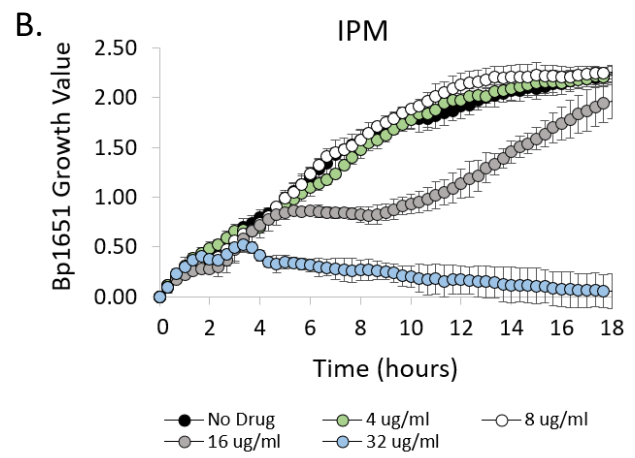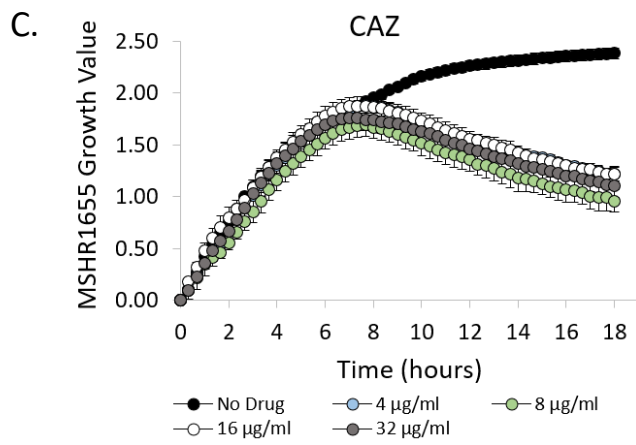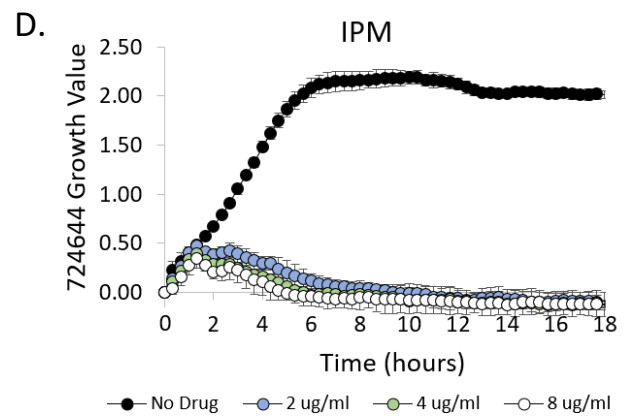

Supplement: 12866_2020_1865_MOESM1_ESM.pdf [file 12866_2020_1865_MOESM1_ESM.pdf]
